# Supplementary material for: Agricultural Intensification Reduces the Portfolio of Wetland Ecosystem Services: European Danube River Lowlands as a Global Biodiversity Hotspot
Source: MDPI journal article supplement (doi:10.3390/land12030722), 2023-03-21
Supplement: s1 [file s1]

## Supplementary Material

**Table S1**

The collected data for each territorial administrative unit (TAU) within the study area (8 communes and 3 cities)) was analysed in order to estimate and quantify the provisioning services. An overview of the data sources and time frames are presented in supplementary material.

|                                 | Pre-communist period<br>(1900-1945)                                                               | Communist period<br>(1946-1989)                                                                                             | Transition and EU period<br>(1990-present)                                                                   |                                                                                                                                    |
|---------------------------------|---------------------------------------------------------------------------------------------------|-----------------------------------------------------------------------------------------------------------------------------|--------------------------------------------------------------------------------------------------------------|------------------------------------------------------------------------------------------------------------------------------------|
| Land cover                      | historical topographic maps (3rd Military Mapping Survey of Austria-Hungary, 1910 scale 1:200000) | Corine Land Cover 1990                                                                                                      | Corine Land Cover 2018                                                                                       |                                                                                                                                    |
| Crop provisioning services      | Vădineanu et al. (2004)                                                                           | 1960-1990 (Data obtained from the Regional Office of the National Institute of Statistics in Braila, at municipality level) | 1990-2004 (Data obtained from National Institute of Statistics, for the entire LTSER, at municipality level) | 2004-2016 (Data from the National Institute of Statistics, obtained at county level in production/hectare for the entire LTSER)    |
| Fish provisioning services      | Vădineanu et al. (2004); Luiza Florea (unpublished data)                                          | Literature available data (Vădineanu et al. 2004; Luiza Florea unpublished data)                                            | Literature available data (Vădineanu et al. 2004; Luiza Florea unpublished data)                             | 2009-2014 (Data obtained from regional fishing administration)                                                                     |
| Timber provisioning services    | Vădineanu et al. (2004)                                                                           | Vădineanu et al. (2004)                                                                                                     | 1990-2004 (Data obtained from National Institute of Statistics, for the entire LTSER, at municipality level) | 2004-2016 (Data from the National Institute of Statistics, obtained at county level in in production/hectare for the entire LTSER) |
| Livestock provisioning services | Vădineanu et al. (2004)                                                                           | 1960-1990 Data obtained from the Regional Office of the National Institute of Statistics in Braila, at municipality level   | 1990-2004 (Data obtained from National Institute of Statistics, for the entire LTSER, at municipality level) | 2004-2016 Data from the National Institute of Statistics, obtained at county level in production/hectare for the entire LTSER)     |

Table S2

Data used in HANPP valuation method for the pre-communist period (1900-1945).

| Landcover                     | Potential Net Primary Production (NPP0) g C / m2 /yr *               | Actual Net Primary Production (NPPact) g C / m2 /yr *         | Harvested Net Primary Production (NPPh) g C / m2 /yr | Human Appropriation of Net Primary Production (HANPP) g C / m2 / yr* | Data Sources                                                                                                                                                                                                                                                                                                                                                                                                                       |
|-------------------------------|----------------------------------------------------------------------|---------------------------------------------------------------|------------------------------------------------------|----------------------------------------------------------------------|------------------------------------------------------------------------------------------------------------------------------------------------------------------------------------------------------------------------------------------------------------------------------------------------------------------------------------------------------------------------------------------------------------------------------------|
| Urban areas                   | N/A                                                                  | 429.18                                                        |                                                      | 226.85                                                               | * (96 - Gingrich, S.; Niedertscheider, M.; Kastner, T.; Haberl, H.; Cosor, G.; Krausmann, F.; Kuemmerle, T.; Müller, D.; Reith-Musel, A.; Jepsen, M. R.; Vadineanu, A.; Erb, K.-H. (2015): Exploring long-term trends in land use change and above ground human appropriation of net primary production in nine European countries. In: Land Use Policy 47, pp 426-438. DOI: 10.1016/j.landusepol.2015.04.027)                     |
| Agricultural areas            | 652.97                                                               | 457.08                                                        |                                                      | 241.6                                                                |                                                                                                                                                                                                                                                                                                                                                                                                                                    |
| Forest areas                  | 640 ((Haberl et al., 2001; Haberl et al., 2007; Schwarzmüller, 2008) | 621 *<br>1242 g DW / m2 / yr<br>(using 0.5 conversion factorA | 55.86 g C / m2 / yr**                                | 74.86                                                                | *Derived using the average productivity (gDW/m2/yr) data obtained by Roxana Cazacu, 2002, PhD thesis for forested areas in 2 plots (F3, F2) of the study site and assumed to be constant for the entire period<br>**Derived using literature available data (Vădineanu et al. 2003) on timber harvest (m3/ha) using a density conversion factor of 420 kg/m3 for Salix sp. and 0.5 conversion factor for carbon concentration (98) |
| Semi-natural areas (Pastures) | 267.9                                                                | 187.5                                                         |                                                      | 180                                                                  | * (96 - Gingrich, S.; Niedertscheider, M.; Kastner, T.; Haberl, H.; Cosor, G.; Krausmann, F.; Kuemmerle, T.; Müller, D.; Reith-Musel, A.; Jepsen, M. R.; Vadineanu, A.; Erb, K.-H. (2015): Exploring long-term trends in land use change and above ground human appropriation of net primary production in nine European countries. In: Land Use Policy 47,                                                                        |

|                |        |     |  |       |                                                                                                                                                                                                                                     |
|----------------|--------|-----|--|-------|-------------------------------------------------------------------------------------------------------------------------------------------------------------------------------------------------------------------------------------|
|                |        |     |  |       | pp 426-438. DOI: 10.1016/j.landusepol.2015.04.027)<br>*NPP0 was calculated using HANPPharv % NPP pot (average values/period)                                                                                                        |
| Inland marshes | 1000   | 700 |  | 300   | Calculated using NPP act data derived using average value from Asselman I, 1989, Global Distribution of Natural Freshwater Wetland and Rice Paddies their Net Primary Productivity, Seasonality and Possible Methane Emissions (97) |
| Water bodies   | 564.29 | 395 |  | 169.2 | Calculated after Cristofor et al. 2003, Long-term changes of submerged macrophytes in the Lower Danube Wetland System, using values for Baclanesti Lake 1982 (99)                                                                   |

**Table S3**

Data used in HANPP valuation method for the communist period (1945-1989).

| Landcover          | Potential Net Primary Production (NPP0) g C / m2 /yr * | Actual Net Primary Production (NPPact) g C / m2 /yr * | Harvested Net Primary Production (NPPh) g C / m2 /yr | Human Appropriation of Net Primary Production (HANPP) g C / m2 /yr* | Data Sources                                                                                                                                                                                                                                                                                                                                                                                                                                                                           |
|--------------------|--------------------------------------------------------|-------------------------------------------------------|------------------------------------------------------|---------------------------------------------------------------------|----------------------------------------------------------------------------------------------------------------------------------------------------------------------------------------------------------------------------------------------------------------------------------------------------------------------------------------------------------------------------------------------------------------------------------------------------------------------------------------|
| Urban areas        | N/A                                                    | 467.61                                                |                                                      | 242.47                                                              | *(96 - Gingrich, S.; Niederscheider, M.; Kastner, T.; Haberl, H.; Cosor, G.; Krausmann, F.; Kuemmerle, T.; Müller, D.; Reith-Musel, A.; Jepsen, M. R.; Vadineanu, A.; Erb, K.-H. (2015): Exploring long-term trends in land use change and above ground human appropriation of net primary production in nine European countries. In: Land Use Policy 47, pp 426-438. DOI: 10.1016/j.landusepol.2015.04.027)<br>*NPP0 was calculated using HANPPharv % NPP pot (average values/period) |
| Agricultural areas | 620.83                                                 | 502.87                                                |                                                      | 260.75                                                              |                                                                                                                                                                                                                                                                                                                                                                                                                                                                                        |

|                               |                                                                      |                                                                                                |                                   |        |                                                                                                                                                                                                                                                                                                                                                                                                                                                                                         |
|-------------------------------|----------------------------------------------------------------------|------------------------------------------------------------------------------------------------|-----------------------------------|--------|-----------------------------------------------------------------------------------------------------------------------------------------------------------------------------------------------------------------------------------------------------------------------------------------------------------------------------------------------------------------------------------------------------------------------------------------------------------------------------------------|
| Forest areas                  | 640 ((Haberl et al., 2001; Haberl et al., 2007; Schwarzmüller, 2008) | 621 g C / m <sup>2</sup> /yr*<br>1242 g DW / m <sup>2</sup> / yr (using 0.5 conversion factor) | 88.83 g C / m <sup>2</sup> / yr** | 107.83 | *Derived using the average productivity (gDW/m <sup>2</sup> /yr) data obtained by Roxana Cazacu, 2002, PhD thesis for forested areas in 2 plots (F3, F2) of the study site and assumed to be constant for the entire period<br>**Derived using statistical data (National Institute of Statistics, INSSE, 2018) on timber harvest (m <sup>3</sup> /ha) using a density conversion factor of 420 kg/m <sup>3</sup> for Salix sp. and 0.5 conversion factor for carbon concentration (98) |
| Semi-natural areas (Pastures) | 358.99                                                               | 290.78                                                                                         |                                   | 150.78 | *(96 - Gingrich, S.; Niederscheider, M.; Kastner, T.; Haberl, H.; Cosor, G.; Krausmann, F.; Kuemmerle, T.; Müller, D.; Reith-Musel, A.; Jepsen, M. R.; Vadineanu, A.; Erb, K.-H. (2015): Exploring long-term trends in land use change and above ground human appropriation of net primary production in nine European countries. In: Land Use Policy 47, pp 426-438. DOI: 10.1016/j.landusepol.2015.04.027)<br>*NPP0 was calculated using HANPPharv % NPP pot (average values/period)  |
| Inland Marshes                | 864.2                                                                | 700                                                                                            |                                   | 164.2  | Calculated using NPP act data derived using average value from Asselman I, 1989, Global Distribution of Natural Freshwater Wetlands and Rice Paddies their Net Primary Productivity, Seasonality and Possible Methane Emissions (97)                                                                                                                                                                                                                                                    |
| Waterbodies                   | 490.74                                                               | 397.5                                                                                          |                                   | 93.24  | Calculated after Cristofor et al. 2003, Long-term changes of submerged macrophytes in the Lower Danube Wetland System, using values for Baclanesti Lake 1982 (99)                                                                                                                                                                                                                                                                                                                       |

Table S4

Data used in HANPP valuation method for the transition and EU period.

| Landcover          | Potential Net Primary Production (NPP0) g C / m <sup>2</sup> / yr *  | Actual Net Primary Production (NPPact) g C / m <sup>2</sup> / yr *                              | Harvested Net Primary Production (NPPh) g C / m <sup>2</sup> / yr | Human Appropriation of Net Primary Production (HANPP) g C / m <sup>2</sup> / yr* | Data Sources                                                                                                                                                                                                                                                                                                                                                                                                                                                                                         |
|--------------------|----------------------------------------------------------------------|-------------------------------------------------------------------------------------------------|-------------------------------------------------------------------|----------------------------------------------------------------------------------|------------------------------------------------------------------------------------------------------------------------------------------------------------------------------------------------------------------------------------------------------------------------------------------------------------------------------------------------------------------------------------------------------------------------------------------------------------------------------------------------------|
| Urban areas        | N/A                                                                  | 631.88                                                                                          |                                                                   | 282.49                                                                           | <p>** (96 - Gingrich, S.; Niedertscheider, M.; Kastner, T.; Haberl, H.; Cosor, G.; Krausmann, F.; Kuemmerle, T.; Müller, D.; Reith-Musel, A.; Jepsen, M. R.; Vadineanu, A.; Erb, K.-H. (2015): Exploring long-term trends in land use change and above ground human appropriation of net primary production in nine European countries. In: Land Use Policy 47, pp 426-438. DOI: 10.1016/j.landusepol.2015.04.027)</p> <p>*NPP0 was calculated using HANPPharv % NPP pot (average values/period)</p> |
| Agricultural areas | 735.53                                                               | 625.20                                                                                          |                                                                   | 279.50                                                                           |                                                                                                                                                                                                                                                                                                                                                                                                                                                                                                      |
| Forest areas       | 640 ((Haberl et al., 2001; Haberl et al., 2007; Schwarzmüller, 2008) | 621 g C / m <sup>2</sup> / yr*<br>1242 g DW / m <sup>2</sup> / yr (using 0.5 conversion factor) | 89.25 g C / m <sup>2</sup> / yr**                                 | 108.25                                                                           | <p>*Derived using the average productivity (gDW/m<sup>2</sup>/yr) data obtained by Roxana Cazacu, 2002, PhD Thesis for forested areas in 2 plots (F3, F2) of the study site and assumed to be constant for the entire period</p> <p>**Derived using statistical data (National Institute of Statistics, INSSE, 2018) on timber harvest (m<sup>3</sup>/ha) using a density conversion factor of 420 kg/m<sup>3</sup> for Salix sp. and 0.5 conversion factor for carbon concentration (98)</p>        |

|                               |        |        |  |        |                                                                                                                                                                                                                                                                                                                                                                                                                                                                                                                                                     |
|-------------------------------|--------|--------|--|--------|-----------------------------------------------------------------------------------------------------------------------------------------------------------------------------------------------------------------------------------------------------------------------------------------------------------------------------------------------------------------------------------------------------------------------------------------------------------------------------------------------------------------------------------------------------|
| Semi-natural areas (Pastures) | 223.13 | 189.66 |  | 84.79  | <p>** (96 - Gingrich, S.; Niedertscheider, M.; Kastner, T.; Haberl, H.; Cosor, G.; Krausmann, F.; Kuemmerle, T.; Müller, D.; Reith-Musel, A.; Jepsen, M. R.; Vadineanu, A.; Erb, K.-H. (2015): Exploring long-term trends in land use change and above ground human appropriation of net primary production in nine European countries. In: Land Use Policy 47, pp 426-438. DOI: 10.1016/j.landusepol.2015.04.027)</p> <p>*NPP0 was calculated using <math>\text{HANPP}_{\text{harv}} \% \text{NPP}_{\text{pot}}</math> (average values/period)</p> |
| Inland marshes                | 823.52 | 700    |  | 123.52 | Calculated using NPP act data derived using average value from Asselman I, 1989, Global Distribution of Natural Freshwater Wetlands and Rice Paddies, their Net Primary Productivity, Seasonality and Possible Methane Emissions (97)                                                                                                                                                                                                                                                                                                               |
| Water bodies                  | 396.47 | 337    |  | 59.47  | Calculated after Cristofor et al. 2003, Long-term changes of submerged macrophytes in the Lower Danube Wetland System, using values for Baiclanesti Lake 1982 (99)                                                                                                                                                                                                                                                                                                                                                                                  |

Table S5

|                                                 | Lucerne | Wheat | Barley | Sunflower | Maize | Soybean |
|-------------------------------------------------|---------|-------|--------|-----------|-------|---------|
| <b>I. Total Direct input costs (1.+...+9.):</b> | 2,275   | 836   | 740    | 929       | 1,549 | 1,408   |
| 1. <i>Direct costs</i>                          | 1,132   | 418   | 370    | 487       | 774   | 704     |
| 2. <i>Material costs</i>                        | 440     | 237   | 206    | 332       | 529   | 457     |
| 3. <i>Irrigations</i>                           | 118     | 16    | 10     | n/a       | 69    | 66      |
| 4. <i>Salaries</i>                              | 470     | 17    | 13     | n/a       | 23    | 21      |
| 5. <i>Land renting</i>                          | 104     | 104   | 104    | 104       | 104   | 104     |
| 6. <i>Taxes</i>                                 | 10      | 6     | 6      | 6         | 6     | 6       |
| 7. <i>Insurances</i>                            | n/a     | 5     | 5      | n/a       | 9     | 8       |
| 8. <i>Transportation taxes</i>                  | 2       | 2     | 2      | n/a       | 2     | n/a     |
| 9. <i>Services</i>                              | n/a     | 31    | 24     | n/a       | 33    | 43      |
| <b>II: Indirect input costs:</b>                | n/a     | 135   | 116    | 204       | 247   | 247     |
| 1. <i>Tractors</i>                              | 20      | 37    | 32     | 55        | 67    | 67      |
| 2. <i>Combine Harvester</i>                     | 6       | 25    | 21     | 37        | 45    | 45      |
| 3. <i>Irrigations</i>                           | 16      | 32    | 29     | 51        | 62    | 62      |
| 4. <i>Common costs</i>                          | 8       | 41    | 35     | 60        | 73    | 73      |
| <b>III. Production costs</b>                    | 109     | 897   | 907    | 932       | 1,270 | 1,199   |
| <b>IV. Market expenses</b>                      |         | 58    | 63     | 39        | 181   | 37      |
| <i>Total expenses</i>                           | 2,400   | 955   | 970    | 971       | 1,450 | 1,237   |
| <i>Sales</i>                                    | 2,900   | 1,050 | 1,050  | 1,330     | 1,950 | 1,480   |
| <i>Profit</i>                                   | 500     | 95    | 80     | 359       | 500   | 243     |
